# Supplementary material for: Inferring time-dependent population growth rates in cell cultures undergoing adaptation
Source: PubMed Central journal article supplement (PMC7745411; doi:10.1186/s12859-020-03887-7), 2020-12-17
Supplement: 12859_2020_3887_MOESM1_ESM.pdf [file 12859_2020_3887_MOESM1_ESM.pdf]

D. 0, Rpl. 0

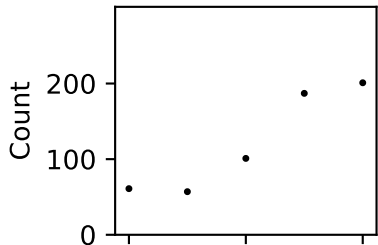

D. 0, Rpl. 1

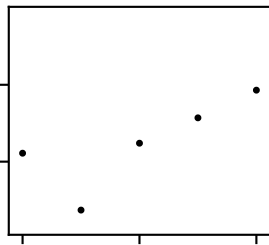

D. 1, Rpl. 0

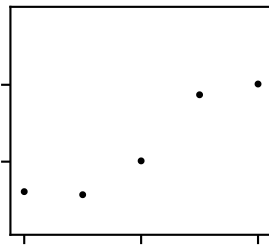

D. 1, Rpl. 1

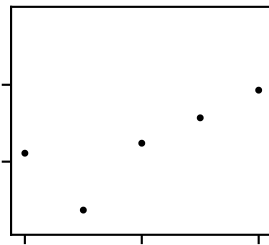

D. 2, Rpl. 0

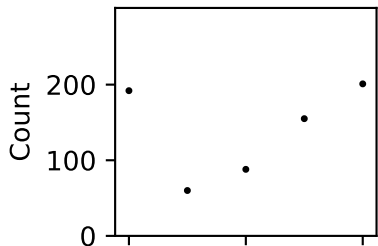

D. 2, Rpl. 1

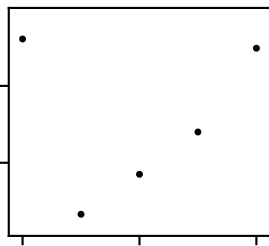

D. 3, Rpl. 0

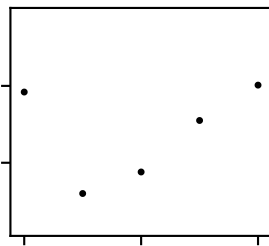

D. 3, Rpl. 1

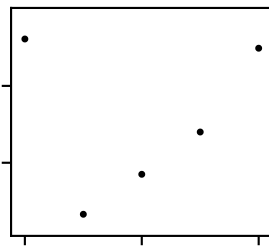

D. 4, Rpl. 0

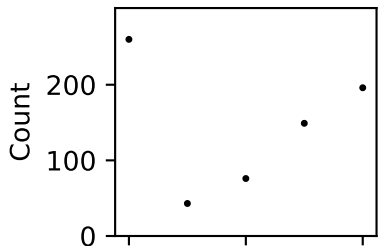

D. 4, Rpl. 1

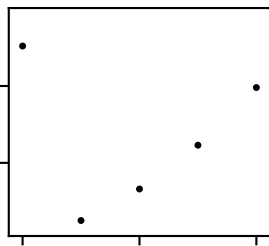

D. 5, Rpl. 0

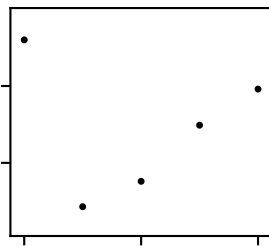

D. 5, Rpl. 1

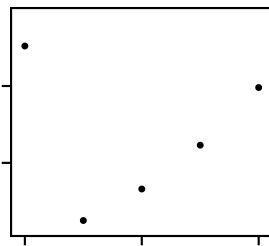

D. 6, Rpl. 0

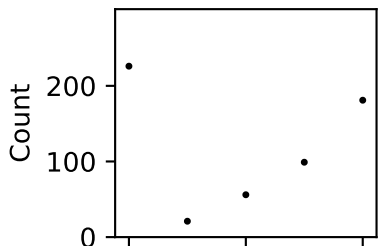

D. 6, Rpl. 1

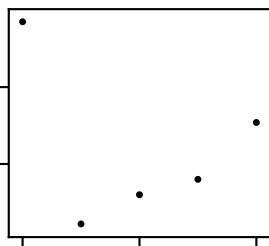

D. 7, Rpl. 0

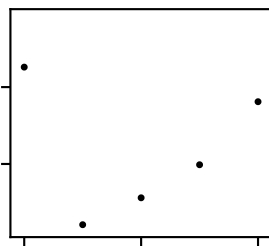

D. 7, Rpl. 1

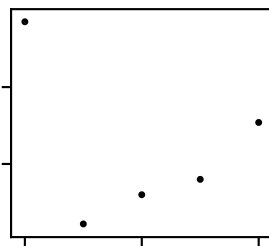

Time [days]

Time [days]

Time [days]

Time [days]
